# Supplementary material
Source: publisher figshare collection journal article supplement (https://acs.figshare.com/ndownloader/files/18040892)
Supplement: Supplementary file 1 [file 18040892]

## Sheet: List1
Table S1. The results of BLASTN analysis of amplicon sequences for low abundant transcripts tested by qPCR.
No.	Protein Acc.	Gene name	Ct value	RefSeq Acc.	Upper primer	Low primer	Results of amplicone sequencing	BLAST results
								Sequences producing significant alignments	Max Score	Total Score	Query Cover	E-value	Per. Ident
1	NX_Q12798	CETN1	33.5	NM_004066.2	CTGCAGGAGATGATCGACGAA	GCAGCCGCTGTCCTCTAAGGT	CGAAGGCAAGGGCGGCGAGTGACGAGGAGGAGTTCCTTCGGATCATGAAGAAGACCAGCCTTTACTGAAGTCGGTTCAGAAGCTAAAGTGACTCTCTGGGTTGCCTGCTTCCATTTTGTGAAACCTTAGAGGACAGCGGCTGCCA	Homo sapiens centrin 1 (CETN1), mRNA (NM_004066.2 )	235	235	0.93	5e-60	0.9783
2	NX_Q6ZSG1	RNF165	34.1	NM_152470.2; NM_001256758.1	CCCAGTCTCAATGCCCTCGTA	TCCCGCATGAACCAGTCGT	CTGGCTAGAGGCGGATACTTGTCACATATTTGAAGAAATTCCATACAGTGAAGGAAATTTGAGTCTGTATTGCTGCTACAAGGGTAAAACCAGGACCAATGGGTAAAAGTAACAGGCGGGCAGATTTTGGCTTGAGGAAGAGCTTCTAGCACGACTGGTTCATGCGGGAAA	Homo sapiens ring finger protein 165 (RNF165), mRNA (NM_152470.2; NM_001256758.1 )	292	292	0.92	4e-77	1
3	NX_Q8N6D5	ANKRD29	35.1	NM_173505.4; NM_001308238.1	AGCTGCCCAAGGTGGTTACTT	TGCTGTTGTGCCATCGTTC	GGACGGATCTGCTGGCGTCAGGAGCAAAGTCAACCACGCCAAGGCAGGACGGGACAGCGCCCCTGTGGATCGCGTCCCAGATGGGCCACAGCGAGGTGGTGCGGGTGATGCTGCTGCGCGGAGCCGACCGCGACGCTGCGCGGAACGAGGCACAACAGCAA	Homo sapiens ankyrin repeat domain 29 (ANKRD29), mRNA (NM_173505.3; NM_001308238.1)	259	259	0.94	3e-67	0.974
4	NX_Q9BXA9	SALL3	34.4	NM_171999.3	TCGCCATGAAGAACAACGAGA	ATCCTCGATAAACCGCGTGAA	ATAGACGGCGGCATCCCCCAGCTCCCCGTGAGTCTTGGGGGCAGCGCCCTCCCCCCTCTGGGCAGCATGGCCAGTGGGATGGACAAAGCACGCACTGGCAGTAGCCCACCCATCGTCAGCTTGGACAAAGCGAGCTCAGAAACAGCAGCCAGCCGCCCATTCACGCGGTTTATCGAGGATTGA	Homo sapiens spalt like transcription factor 3 (SALL3), mRNA (NM_171999.3)	326	326	0.96	4e-87	1
5	NX_Q3B7S5	SMIM21	32.8	NM_001037331.3	GAAGATGGGCAACAAGTCGAG	GCAGCCGCCTTAACTTTGAGT	TATCGTAATTGTGGCTGACTTAATTACCTTGTTCCTGAGTGCAGAGATCAAATTGAGCAACTTAAGGTGCTAAAGCTCTGTGCCAGCTGGAAATGAAAAGGAAATAATTAACACCAACAAGAGCTACGTCTAAGGTTGTGGCACCTCCTGACAGAAGCAAGGAGACTCAAAGTAAAGGCGGCTGC	Homo sapiens small integral membrane protein 21 (SMIM21), mRNA (NM_001037331.3)	324	324	0.96	1e-86	0.9944
6	NX_Q9H2B2	SYT4	32.9	NM_020783.4	CGGCATCTCTGTGAAAGCAAC	GGCCTCGTCCAACAACCATAC	GCGTCTGCTAGTGTGTAGTTTGGGGAGTCAATGGCCATTTTATGTATGTGCATTTGGTATCATGGGCCGTGGAACAGAATATATGTTGGACCTCTGAAAAGTTGTAAGGGGCCAATTCTAAGTATTCTTCACGGCAGCCAGAAGTTAATGGTGGTAGCAGCTGAGGTATGGTTGTTGGACGAGGCCCAA	Homo sapiens synaptotagmin 4 (SYT4), mRNA (NM_020783.3 )	316	316	0.93	2e-84	0.9888
7	NX_Q9Y2V3	RAX	34.1	NM_013435.2	CCTGGCATGACGCAATATGGA	ACCCGCAGAGAAAGGACTGGA	ATTCATTTCCCGAATTCCCTGGCTGTTCTCCGGTTCCTGAAACCGACTTGGGAAAAGGATGACCACGCTGGAGCTGGGAATATGGGAAGCCTCATCATAGTTTCCAGTCCTTTCTCTGCGGGTCGA	Homo sapiens retina and anterior neural fold homeobox (RAX), mRNA (NM_013435.2 )	215	215	0.96	6e-54	0.9837
8	NX_Q9P2N2	ARHGAP28	33.9	NM_001366230.1; NM_001366231.1	CCTTCAGCCGTTCCAACTCAG	GCTTGGGTTCGAGTCAATGTG	CAGTCGCGCTCATGGAGGATTTCTGGCGGGAATAGAAAGTATTAAAGACAGCAGCATGGGAGGGCAAGAAGAGCCACCGCCAGCTGAGGTCACACCTGTGGATGAAGGAGAACTTGAAGCAGAATGGCTGCAAGATGTGGGTTTATCAACTCTGATCTCAGGTGATGAAGAGGAAGATGGCAAAGCCTTGCTCTCCACATTGACCCCAAACCCAAGCCA	Homo sapiens Rho GTPase activating protein 28 (ARHGAP28), mRNA (NM_001010000.2)	191	191	0.51	2e-46	0.9735
9	NX_Q8IYS8	BOD1L2	33.9	NM_001257964.2	GAAGCAAGTTCGCCAGAGAGA	CCTGGGTCGCGGTAGTGT	TGGTGAGTCTGCATTGCGCTGCCATTTGGCCAGCCTTTCCAAGGGCATGACACCAAACACACACTACAGAGAGGGAAACACTACCGCGGCCCAGGA	Homo sapiens biorientation of chromosomes in cell division 1 like 2 (BOD1L2), mRNA (NM_001257964.1 )	158	158	0.91	7e-37	0.9886
10	NX_Q6ZT83	FLJ44881	33.7	see article text for details	CGCAAGGACACTCCGCTCAT	GAGCACGGCCCAGGTGTAACT	AGACCTACTAGTTTTCTTCCATGAGTGATTTCTATTCAGAGCAAGTAAAACACAGCCTGTGACACTGTTTGTCCCGAATGTCAACAGCGCTCTCTGTGATCAGCCCGTTGTACGAGGTGTTGGAATACATGAACAACGCAAACGGAATATCTCGTCTCTCATTTCTGTCTTTAATCATTGGCTGCCTCCACTCCAGTTACACTGGGGAACGTGCTCTAAA	Homo sapiens long intergenic non-protein coding RNA 1879 (LINC01879), long non-coding RNA
